# 1 Factors influencing the COVID-19 daily deaths peak across 2 European countries

3 Katarzyna Jabłońska<sup>1</sup>, Samuel Aballéa<sup>2</sup>, Mondher Toumi<sup>3</sup>

4

5 <sup>1</sup> MSc, Creativ-Ceutical, ul. Przemysłowa 12, 30-701 Kraków, Poland

6 <sup>2</sup> MSc, PhD, Creativ-Ceutical, Westblaak 90, 3012KM Rotterdam, Netherlands

7 <sup>3</sup> MD, MSc, PhD, Professor of Public Health, Faculty of Medicine, Public Health Department,  
8 Aix-Marseille University, 27 Boulevard Jean Moulin, Marseille 13005, France

9 Corresponding author: Katarzyna Jabłońska, [katarzyna.jablonska@creativ-ceutical.com](mailto:katarzyna.jablonska@creativ-ceutical.com)

10

## 11 Abstract

12 **OBJECTIVES:** The purpose of this study was to determine predictors of the height of COVID-  
13 19 daily deaths peak and time to the peak, in order to explain their variability across European  
14 countries.

15 **STUDY DESIGN:** For 34 European countries, publicly available data were collected on daily  
16 numbers of COVID-19 deaths, population size, healthcare capacity, government restrictions  
17 and their timing, tourism and change in mobility during the pandemic.

18 **METHODS:** Univariate and multivariate generalised linear models using different selection  
19 algorithms (forward, backward, stepwise and genetic algorithm) were analysed with height of  
20 COVID-19 daily deaths peak and time to the peak as dependent variables.

21 **RESULTS:** The proportion of the population living in urban areas, mobility at the day of first  
22 reported death and number of infections when borders were closed were assessed as  
23 significant predictors of the height of COVID-19 daily deaths peak. Testing the model with  
24 variety of selection algorithms provided consistent results. Total hospital bed capacity,  
25 population size, number of foreign travellers and day of border closure, were found as  
26 significant predictors of time to COVID-19 daily deaths peak.

27 **CONCLUSIONS:** Our analysis demonstrated that countries with higher proportions of the  
28 population living in urban areas, with lower reduction in mobility at the beginning of the  
29 pandemic, and countries which closed borders having more infected people experienced  
30 higher peak of COVID-19 deaths. Greater bed capacity, bigger population size and later  
31 border closure could result in delaying time to reach the deaths peak, whereas a high number  
32 of foreign travellers could accelerate it.

33 **Keywords:** COVID-19, mortality, healthcare capacity, modelling.

34

35

## 36 Introduction

37 The coronavirus infectious disease 2019 (COVID-19) outbreak was announced as a pandemic  
38 by the World Health Organization (WHO) on 11 March 2020.<sup>1</sup> By the end of March, Europe  
39 exceeded Asia and became the region experiencing the highest percentage mortality from the  
40 virus across the world,<sup>2</sup> until 10 June 2020, when the rapidly growing COVID-19 mortality rate  
41 in the Americas exceeded all other continents.<sup>3</sup> According to the WHO report from 5 July 2020,  
42 38% of the global mortality due to COVID-19 was from Europe.<sup>4</sup>

43 Since incidence and mortality rates varied between countries, numerous studies have recently  
44 been published investigating factors associated with COVID-19 infection and death rate  
45 across countries. A variety of potential predictors have been assessed in the literature, such  
46 as country-specific demographic and health characteristics, economic and social indicators,<sup>5-</sup>  
47 <sup>8</sup> mobility scores and social-distancing measures,<sup>9, 10</sup> as well as ecological and environmental  
48 perspectives.<sup>8, 11</sup> To assess the relationship between covariates and COVID-19 incidence or  
49 mortality, the most common approach used by authors was to analyse multivariate regression  
50 models of total number of infections or deaths up to a given time point, using log-transformed  
51 data or without any transformation, as well as daily data on infections or deaths as outcomes.

52 In this study, we used data on numbers of deaths, not infections, since the former has a much  
53 higher degree of reliability than the latter, being better monitored and less dependent on the  
54 number of tests done. Since all European countries seem to already reach the peak of deaths  
55 by 3 June 2020 from the first wave of COVID-19 disease, our idea was to use height of daily  
56 deaths peak as a primary outcome of interest, and time to the peak as a secondary outcome.

57 To the best of our knowledge, this perspective has not been investigated so far. When raw  
58 and cumulative daily numbers of infections and deaths are subject to deviations from between-  
59 country differences in reporting and depend on the date up to which the analysis is performed,  
60 maximum number of daily deaths can be assessed as an interesting new indicator of disease  
61 mortality magnitude. In addition, analysis of the height of daily deaths peak enables us to  
62 assess the overall capacity of healthcare systems.

63 This study aims to detect significant drivers of COVID-19 mortality with the use of multivariate  
64 generalised linear models (GLM) and distinct selection algorithms, to explain the variability of  
65 height of and time to the deaths peak among European countries. This will enable us to draw  
66 conclusions about how governments and societies can improve the future response on similar  
67 pandemic or global life-threatening situations.

68

## 69 Methods

### 70 Data collection

71 A total of 34 European countries were included in the analysis. The height of COVID-19 daily  
72 deaths peak was the primary outcome of interest, defined as maximum daily reported number  
73 of people who died due to COVID-19 per country up to 3 June 2020. The value was then  
74 divided by the number of inhabitants of a given country reported in January 2020 and  
75 multiplied by 1 million to obtain the deaths peak height per 1 million inhabitants.

76 The secondary outcome of interest was time to COVID-19 daily deaths peak, defined as  
77 number of days from the day when the first death was reported in a given country, up to the  
78 day of reaching the COVID-19 daily deaths peak.

79 A set of explanatory variables used to predict outcomes consisted of the following:

- 80 • Healthcare capacity:
  - 81 ○ All beds capacity (number of hospital bed units)
  - 82 ○ Intensive care unit (ICU) beds capacity (number of ICU)
  - 83 ○ Number of tests conducted up to the time of the peak
- 84 • Government restrictions and associated factors:
  - 85 ○ 'Stay at home' order date
  - 86 ○ Educational facilities closure date
  - 87 ○ Gathering restriction date
  - 88 ○ Businesses closure date
  - 89 ○ Border closure date
  - 90 ○ Total number of COVID-19 infected people when borders were closed
  - 91 ○ Total number of COVID-19 deaths when borders were closed
- 92 • Indicators of the population size:
  - 93 ○ Country population size (in January 2020)
  - 94 ○ Percentage of population living in urban areas
  - 95 ○ Percentage of population living in metropolitan cities with more than 1 million  
96 inhabitants
- 97 • Median age
- 98 • Tourism:
  - 99 ○ Number of travellers that arrived at airports in 2018
  - 100 ○ Number of foreign tourists in 2018 (arrivals at any touristic accommodation)
- 101 • Mean mobility score at the day of first reported COVID-19 death (as a difference from  
102 the average mobility reported before the pandemic), calculated across mobility scores  
103 at:
  - 104 ○ Retail and recreation places
  - 105 ○ Workplaces
  - 106 ○ Transit stations

107 All dates were considered as number of days after the day of first reported COVID-19 death  
108 in each country. Variables indicating healthcare capacity and tourism were considered in  
109 relation to the population size of a given country (per inhabitant or 1 million inhabitants).

#### 110 *Data sources*

111 Data on COVID-19 deaths, infections, number of tests, all and ICU beds capacity, dates of  
112 government restrictions, population size and urban population size were taken from  
113 Worldometer.com.<sup>12</sup> Missing dates of government restrictions, if officially issued, were found  
114 on Wikipedia.<sup>13</sup>

115 Mobility scores were uploaded from Google COVID-19 Community Mobility Reports.<sup>14</sup> Scores  
116 were reported as percentage changes from a usual mobility calculated before the pandemic  
117 in Europe, between 3 January and 6 February 2020. Mobility scores were subject to  
118 oscillations due to daily reporting and presence of weekends and holidays; therefore, we used  
119 smoothed mobility scores produced with a nonparametric technique that uses local weighted  
120 regression and fits a smooth curve through points in a scatter plot, called *loess regression*.<sup>15</sup>

121 Data on number of passengers arrived at airports, tourism and population living in metropolitan  
122 areas were downloaded from Eurostat,<sup>16</sup> except for Russia, Turkey and Ukraine, for which  
123 data were gathered from other sources.<sup>17-20</sup>

#### 124 *Missing data and imputation*

125 If government restrictions were not officially set, the date was imputed with date of the peak  
126 in each country. Missing data on mobility for Cyprus and Iceland were imputed with average  
127 scores of remaining countries.

128

### 129 **Statistical analysis**

130 Descriptive statistics on outcomes and explanatory variables were produced. Since the  
131 distribution of deaths peak height per population size is right-skewed, a logarithmic  
132 transformation was applied.

133 Factors influencing the height of deaths peak were analysed using univariate and multivariate  
134 GLM with a normal distribution function and logarithmic link function. The base case scenario  
135 analysis was performed using data available for 34 countries and explanatory variables with  
136 a p-value <0.1 in univariate GLM models. To avoid multicollinearity issues between  
137 independent variables, Pearson correlations were investigated to detect highly correlated  
138 pairs of variables. The correlation was assessed as high if the absolute value exceeded 0.7  
139 and as moderate if the absolute value was contained in a range 0.5–0.7.<sup>21</sup>

140 Due to relatively low sample size, a risk of bias could appear for models with too high number  
141 of variables included. To overcome the problem and limit the number of covariates, sensitivity  
142 analyses were performed using variety of selection algorithms: stepwise, backward, forward  
143 and the genetic algorithm. For the backward, forward and stepwise algorithms, a criterion of  
144 having p-value lower than 0.1 was applied for each variable to stay in a model (backward and  
145 stepwise) and to enter a model (forward and stepwise). For the genetic algorithm, the best  
146 model was fitted based on the value of Akaike's Information Criterion (AIC) corrected for small  
147 sample sizes (AICC). Models with only main effects were considered. Additional sensitivity  
148 analysis was performed removing countries for which imputation of government restriction  
149 dates was needed.

150 Similar methods were used to analyse time to deaths peak but without any transformation  
151 since it seemed to follow a normal distribution. GLM models with a normal distribution function  
152 and identity link function were analysed.

153 For all analyses, a p-value lower than 0.05 was considered as statistically significant. For each  
154 GLM model, fit statistics such as AIC and its equivalent AICC were produced with lower values  
155 indicating better fit.

156 Analyses were performed using SAS 9.4 software. R 3.6.2 software was used to apply the  
157 genetic algorithm with the package *glmulti*.<sup>22</sup>

158

## 159 **Results**

### 160 **Descriptive analysis**

161 Characteristics of the countries included in the study are presented in Table 1, and a histogram  
162 of the height of COVID-19 deaths peak is depicted in Figure 1. The graph presenting deaths  
163 peak height by country is provided in Figure 2.

164 Median height of the peak per 1 million inhabitants per day was equal to 3.48 deaths ([lower  
165 quartile; upper quartile] = [1.68; 12.78]), with Belgium reaching outstandingly higher peak than  
166 other countries. As can be seen from these statistics and the histogram, the height of the  
167 deaths peak does not follow a normal distribution, but it seems it can be well approximated  
168 using a log-normal distribution. Median time to the peak equalled 31 days from the first death  
169 reported in each country with a comparable mean (31.32, SD=13.94). Average numbers of  
170 days when closing schools/universities and when gatherings were banned were both negative  
171 (-0.26 and -1.76, respectively).

172

### 173 **Height of the deaths peak**

174 Univariate GLM models of height of the peak were analysed (Table 2). Eight factors turned  
175 out to be significant: educational facilities closure day, gathering restrictions day, businesses  
176 closure day, proportion living in urban areas, mobility score at the day of first reported death,  
177 border closure day, number of COVID-19 infections when borders were closed, and number  
178 of COVID-19 deaths when borders were closed. All of them have positive estimates. Stay-at-  
179 home order day, as well as the proportion living in metropolitan cities >1 million inhabitants  
180 were close to reaching the significance level ( $p < 0.1$ ). Pearson correlations between variables  
181 reaching or close to reaching significance in univariate models were verified. Results can be  
182 found in Supplementary Materials.

183 A base case multivariate GLM model included six covariates. The proportion living in urban  
184 areas was found significant ( $p < 0.001$ ) and the mobility score at the day of first reported death  
185 was very close to reaching significance ( $p = 0.052$ ). Results are presented in Table 2.  
186 Considering small sample size ( $N = 34$ ), selection algorithms were applied to the base case  
187 model to limit the number of covariates, increase model precision and improve the model fit.  
188 All selection algorithms were consistent and selected the model with three significant  
189 parameters ("final" model), indicating its best fit. The proportion of the population living in urban  
190 areas (6.848,  $p < 0.001$ ), mobility score at the day of first reported death (0.049  $p < 0.001$ ) and  
191 number of infections when borders were closed per 1 million inhabitants (0.0002,  $p = 0.016$ )  
192 were all significantly associated with the deaths peak height (Table 2).

193 Analysis of data removing countries with imputed dates of businesses or borders closure  
194 ( $N = 29$ ) provided consistent results regarding the significance of all three covariates from the  
195 final models in relation to the deaths peak height (details are provided in Supplementary  
196 Materials).

197

### 198 **Time to the deaths peak**

199 Univariate GLM models of time to the peak were analysed (Table 3). Nine factors turned out  
200 to be potentially significant (with  $p < 0.1$ ): all beds capacity, ICU beds capacity, educational  
201 facilities closure day, gathering restrictions day, population size, arrivals at airports per

202 inhabitant, number of foreign tourists per inhabitant, mobility score at the day of first reported  
203 death, as well as day of border closure. The majority of these factors have positive estimates,  
204 except the number of arrivals and tourists. As for the next step, linear correlations between  
205 them were verified. Results can be found in Supplementary Materials.

206 A base case multivariate GLM model was run using six explanatory variables. All beds  
207 capacity, population size in millions and the number of foreign tourists per inhabitant were  
208 found significantly related with time to COVID-19 deaths peak. Results are presented in Table  
209 3. Considering the small sample size (N=34), selection algorithms were applied to the above  
210 multivariate model. The “final” model had four covariates and was selected by the backward  
211 and the genetic algorithm (details in Supplementary Materials). All beds capacity per 1 million  
212 inhabitants (0.003,  $p=0.004$ ), population size in millions (0.142,  $p=0.008$ ), the number of  
213 foreign tourists per inhabitant (- 2.651,  $p=0.037$ ) and border closure day (0.297,  $p=0.008$ ) were  
214 all significantly associated with time to the deaths peak (Table 3).

215 Analysis of data removing countries with imputed dates of borders closure (N=31) provided  
216 consistent results regarding the significance of all beds capacity and population size in relation  
217 to time to deaths peak, whereas number of foreign tourists and borders closure day were close  
218 in reaching significance, both with  $p<0.1$  (details provided in Supplementary Materials).

219

## 220 Discussion

221 This study provides some evidence about factors associated with COVID-19 mortality peak  
222 and time to the peak. One of the strongest predictors of the COVID-19 mortality peak identified  
223 in our analysis was the proportion of population living in urban areas. The relationship between  
224 urbanisation and COVID-19 infections ratio was earlier outlined by the United Nations  
225 Association,<sup>23</sup> estimating that 90% of all reported COVID-19 cases (by July 2020) came from  
226 urban areas, becoming the epicentre of the pandemic. High population density increases the  
227 propensity of viruses spread by increasing the contact rates of individuals. However, some  
228 authors<sup>24</sup> warn readers against putting too much weight on urban density, arguing that large  
229 cities just faced the coronavirus earlier (due to the higher number of incoming people) and that  
230 the timing of epidemic start was of bigger interest than population density itself. This  
231 observation seems to be on the contrary to our study, since neither proportion of population  
232 living in urban areas, nor proportion living in metropolitan cities were related with the time to  
233 deaths peak.

234 Number of infections when borders were closed was found to be another important factor  
235 associated with the COVID-19 deaths peak height, whereas a positive association between  
236 borders closure day and time to reach the peak was observed in this study. It shows that  
237 stopping arrivals to the country at the earlier stage of epidemic can be crucial in reducing the  
238 peak height, stopping the increase of daily number of deaths earlier and, consequently, to  
239 flatten the deaths curve. These findings are on the contrary with Chaudhry who showed no  
240 association between rapid border closures and COVID-19 mortality per million people, using  
241 cumulative data available as of 1 April 2020.<sup>25</sup> However, the peak height and mortality may  
242 not be strongly correlated. For example some countries experience a point peak and dropping  
243 fast, (France, United Kingdom, Spain, Italy) while other countries may experience a flattened  
244 peak with a mortality staying high over a long period of time (US, Brazil, Mexico).<sup>12</sup>

245 The difference in average mobility before the pandemic and at the day when first death was  
246 reported in a country was found to be associated with deaths peak height, which suggests that  
247 rapid reduction in mobility was important in terms of reducing overall mortality. These findings  
248 are consistent with other authors opinion that changes in social-distancing covariates can  
249 flatten the curve by changing the peak death rate.<sup>9, 10</sup>

250 Tourism indicators were found not to be associated with deaths peak height, but to be  
251 significant drivers of time to reach the peak. It suggests that the magnitude of inbound tourism  
252 can have an impact on accelerating the moment of reaching the peak. However, Aldibasi<sup>5</sup> and  
253 Garcia de Alcaniz<sup>8</sup> found tourism to be a significant predictor of COVID-19 mortality and  
254 infection rates. Ostig and Askin<sup>26</sup> also found a significant positive relationship between number  
255 of airline passengers and number of COVID-19 infections.

256 Another conclusion resulting from the study is that timing of government restrictions, especially  
257 border closure, can be found as an important factor in terms of COVID-19 mortality. What can  
258 be observed for many countries is that closing borders (and other government restrictions as  
259 well) took place several days before any death was reported in a country. Therefore, increase  
260 or decrease in mortality can be seen as a result of undertaking preventive action by the  
261 government.

262 There is no general conclusion on the association between COVID-19 fatality and hospital  
263 beds capacity in literature. Our study showed lack of association between beds capacity and  
264 deaths peak height, but higher beds capacity was related with longer time to peak. Garcia de  
265 Alcaniz showed no association between hospital beds density and both the number of  
266 infections and number of deaths at any moment of the pandemic.<sup>8</sup> On the contrary, Sorci  
267 showed that case fatality rate was negatively associated with number of hospital beds per  
268 inhabitants.<sup>7</sup> High bed capacity may be associated with more intensive treatment delaying  
269 time to death for a number of patients thus delaying time to peak but does not affect the peak  
270 height.

271

## 272 **Limitations**

273 Our study has several limitations. Data on a limited number of countries were used. We  
274 decided not to include countries for which reliable and comparative evidence could not be  
275 found, nor countries with very low mortality. Our idea was to focus only on Europe, not to  
276 merge it with countries from other continents and avoid data incomparability issues and  
277 eventual difference in strain as the virus mutate rapidly.

278 However, the number of observations can be assessed as high enough to draw conclusions  
279 based on multivariate GLM models by using selection algorithms. The stability of results was  
280 tested with models based on different variable selection algorithms, being consistent with base  
281 case findings.

282 The set of included explanatory variables can be viewed as non-exhaustive. We decided to  
283 focus on variables important from a social perspective, assuming that mobility factors, tourism,  
284 urbanisation, and government decisions are more of interest to inform upcoming decisions  
285 than other approaches observed in the literature; for example, ecological or environmental  
286 perspectives.<sup>8, 11</sup>

287

## 288 **Conclusions**

289 This study demonstrated the significant drivers of COVID-19 mortality magnitude in Europe  
290 and shed a light on reasons behind the variability between different countries. Countries with  
291 a higher proportion of population living in urban areas, without a rapid reduction in mobility  
292 and with delayed government restrictions, correlated with a higher COVID-19 deaths peak.  
293 These findings can help improve future response in similar situations or in case of a second  
294 wave.

295

296

297 **Acknowledgements:** The authors wish to thank Saima Khan (Apothecom) for proof reading  
298 and editing support.

299 **Contributors:** MT conceived the study, KJ collected and analysed the data, KJ, MT and SA  
300 interpreted the results, KJ wrote the first draft of the manuscript, KJ, MT and SA revised the  
301 manuscript and approved the final version.

302 **Competing interests:** The authors declare no competing interests.

303

304

## 305 **References**

- 306 1. World Health Organisation. Coronavirus disease 2019 (COVID-19) Situation Report – 51 (11  
307 March 2020) 11 March 2020.
- 308 2. World Health Organisation. Coronavirus disease 2019 (COVID-19) Situation Report – 71 (31  
309 March 2020) 31 March 2020.
- 310 3. World Health Organisation. Coronavirus disease (COVID-19) Situation Report – 142 (10 June  
311 2020) 10 June 2020.
- 312 4. World Health Organisation. Coronavirus disease (COVID-19) Situation Report – 167 (5 July  
313 2020) 5 July 2020.
- 314 5. Aldibasi OS, Alharbi NK, Alkelya M, Zowawi H, Alghnam S. The Association of Country-Level  
315 Factors with Outcomes of COVID-19: Analysis of the pandemic after one million cases. *Research*  
316 *Square*. 2020.
- 317 6. Burden SJ, Rademaker J, Weedon BD, Whaymand L, Dawes H, Jones A. Associations of  
318 Global Country Profiles and Modifiable Risk Factors with COVID-19 Cases and Deaths. *medRxiv*.  
319 2020:2020.06.17.20133454.
- 320 7. Sorci G, Faivre B, Morand S. Why Does COVID-19 Case Fatality Rate Vary Among Countries?  
321 *The Lancet*. 2020.
- 322 8. Garcia de Alcaniz JG, Romero-Lopez J, Martinez RP, Lopez-Rodas V, Costas E. What  
323 variables can better predict the number of infections and deaths worldwide by SARS-CoV-2? Variation  
324 through time. *medRxiv*. 2020:2020.06.04.20122176.



- 325 9. Woody S, Garcia Tec M, Dahan M, Gaither K, Lachmann M, Fox S, et al. Projections for first-  
326 wave COVID-19 deaths across the US using social-distancing measures derived from mobile phones.  
327 medRxiv. 2020:2020.04.16.20068163.
- 328 10. Courtemanche C, Garuccio J, Le A, Pinkston J, Yelowitz A. Strong Social Distancing Measures  
329 In The United States Reduced The COVID-19 Growth Rate. Health Affairs.  
330 0:10.1377/hlthaff.2020.00608.
- 331 11. Bray I, Gibson A, White J. Coronavirus disease 2019 mortality: a multivariate ecological analysis  
332 in relation to ethnicity, population density, obesity, deprivation and pollution. Public Health. 2020;  
333 185:261-3.
- 334 12. Worldometer. Covid-19 coronavirus pandemic. [cited 2020, 25 June 2020]; Available from:  
335 <https://www.worldometers.info/coronavirus/>.
- 336 13. Wikipedia. National responses to the COVID-19 pandemic. [cited 2020, 25 June 2020];  
337 Available from: [https://en.wikipedia.org/wiki/National\\_responses\\_to\\_the\\_COVID-19\\_pandemic](https://en.wikipedia.org/wiki/National_responses_to_the_COVID-19_pandemic).
- 338 14. Google. COVID-19 Community Mobility Reports. [cited 2020, 25 June 2020]; Available from:  
339 <https://www.google.com/covid19/mobility/>.
- 340 15. Wicklin R. What is loess regression? SAS Blogs: SAS; 2016 [cited 2020 29 June 2020];  
341 Available from: <https://blogs.sas.com/content/iml/2016/10/17/what-is-loess-regression.html>.
- 342 16. Eurostat. Eurostat Database. [cited 2020 25 June 2020]; Available from:  
343 <https://ec.europa.eu/eurostat/data/database>.
- 344 17. CEIC data. Visitor Arrivals. [cited 2020, 25 June 2020]; Available from:  
345 <https://www.ceicdata.com/en/indicator/russia/visitor-arrivals>,  
346 <https://www.ceicdata.com/en/indicator/turkey/visitor-arrival>,  
347 <https://www.ceicdata.com/en/indicator/ukraine/visitor-arrivals>.
- 348 18. Analytical Credit Rating Agency ACRA. Air traffic increases, finances in crisis [cited 2020, 25  
349 June 2020]; Available from: <https://www.acra-ratings.cn/research/1282>.
- 350 19. Hurriyet Daily News. Air passenger traffic in Turkish airports rose 8.8 percent in 2018. [cited  
351 2020, 25 June 2020]; Available from: <https://www.hurriyetdailynews.com/air-passenger-traffic-in-turkish-airports-rose-8-8-percent-in-2018-140322>.
- 353 20. Kyiv Post. Record-breaking 20.5 million passengers at Ukrainian airports in 2018. [cited 2020,  
354 25 June 2020]; Available from: <https://www.kyivpost.com/ukraine-politics/record-breaking-20-5-million-passengers-passed-through-ukrainian-airports-in-2018.html>.
- 356 21. Mukaka MM. Statistics corner: A guide to appropriate use of correlation coefficient in medical  
357 research. Malawi Med J. 2012; 24:69-71.
- 358 22. Calcagno V, de Mazancourt C. glmulti: An R Package for Easy Automated Model Selection with  
359 ( Generalized ) Linear Models. Journal Of Statistical Software. 2010; 34.
- 360 23. Guterres A. COVID-19 in an Urban World. United Nations.; 2020 [cited 2020 13th August 2020];  
361 Available from: <https://www.un.org/en/coronavirus/covid-19-urban-world>.
- 362 24. Barr J, Tassier T. Are Crowded Cities the Reason for the COVID-19 Pandemic? Placing too  
363 much blame on urban density is a mistake. Scientific American; 2020 [cited 2020 13th August 2020];  
364 Available from: <https://blogs.scientificamerican.com/observations/are-crowded-cities-the-reason-for-the-covid-19-pandemic/>.
- 365

366 25. Chaudhry R, Dranitsaris G, Mubashir T, Bartoszko J, Riaz S. A country level analysis measuring  
367 the impact of government actions, country preparedness and socioeconomic factors on COVID-19  
368 mortality and related health outcomes. *EClinicalMedicine*. 2020; 25.

369 26. Oztig LI, Askin OE. Human mobility and coronavirus disease 2019 (COVID-19): a negative  
370 binomial regression analysis. *Public Health*. 2020; 185:364-7.

371

372

373 **Table 1.** Characteristics of countries included in the analysis.

| Variable                                                                    | N  | Mean    | SD      | Median  | Lower quartile | Upper quartile | Min     | Max     |
|-----------------------------------------------------------------------------|----|---------|---------|---------|----------------|----------------|---------|---------|
| Peak height [no. of deaths per 1 mln inhabitants]                           | 34 | 7.22    | 8.65    | 3.48    | 1.68           | 12.78          | 0.48    | 42.80   |
| Peak height [raw no. of deaths]                                             | 34 | 180.50  | 322.67  | 32.50   | 8.00           | 185.00         | 2.00    | 1172.00 |
| Peak time [no. of days after first death reported]                          | 34 | 31.32   | 13.94   | 31.00   | 22.00          | 40.00          | 2.00    | 71.00   |
| All beds capacity [per 1 mln inhabitants]                                   | 34 | 4940.25 | 1744.89 | 4634.17 | 3427.67        | 6623.84        | 2512.45 | 8248.80 |
| ICU beds capacity [per 1 mln inhabitants]                                   | 34 | 141.14  | 82.61   | 110.94  | 86.50          | 191.75         | 20.72   | 349.20  |
| Total no. of tests up to time of the peak [per 1 mln inhabitants]           | 34 | 763.09  | 743.98  | 526.54  | 443.77         | 824.78         | 148.92  | 4166.11 |
| Stay-at-home order day                                                      | 34 | 8.74    | 10.33   | 8.00    | 1.00           | 14.00          | -6.00   | 41.00   |
| Educational facilities closure day                                          | 34 | -0.26   | 8.31    | 0.50    | -3.00          | 4.00           | -22.00  | 17.00   |
| Gathering restrictions day                                                  | 34 | -1.76   | 8.67    | -1.00   | -6.00          | 2.00           | -21.00  | 17.00   |
| Businesses closure day                                                      | 34 | 3.32    | 10.14   | 2.00    | -1.00          | 7.00           | -16.00  | 41.00   |
| Population size [Jan 2020]                                                  | 34 | 23.82   | 33.02   | 9.33    | 4.94           | 37.85          | 0.34    | 145.93  |
| Proportion living in urban areas                                            | 34 | 0.74    | 0.12    | 0.74    | 0.66           | 0.83           | 0.54    | 0.98    |
| Proportion living in metropolitan cities with more than 1 mln inhabitants   | 34 | 0.28    | 0.19    | 0.31    | 0.12           | 0.44           | 0.00    | 0.56    |
| Median age                                                                  | 34 | 41.85   | 2.96    | 42.50   | 40.50          | 44.00          | 32.00   | 46.70   |
| Arrivals at airports in 2018 [per 1 inhabitant]                             | 34 | 2.27    | 2.63    | 1.52    | 0.84           | 2.79           | 0.24    | 14.86   |
| No. of foreign tourists in 2018 [per 1 inhabitant]                          | 34 | 1.25    | 1.32    | 0.79    | 0.47           | 1.46           | 0.14    | 6.73    |
| Mobility score at the day of first reported death                           | 34 | -23.45  | 18.93   | -20.02  | -44.09         | -5.28          | -56.42  | 0.16    |
| Border closure day                                                          | 34 | 6.71    | 15.53   | 2.50    | -1.00          | 11.00          | -19.00  | 46.00   |
| No. of COVID-19 infections when borders were closed [per 1 mln inhabitants] | 34 | 490.54  | 1116.56 | 83.39   | 21.53          | 245.88         | 0.07    | 5223.83 |
| No. of COVID-19 deaths when borders were closed [per 1 mln inhabitants]     | 34 | 28.56   | 71.73   | 0.27    | 0.00           | 3.17           | 0.00    | 297.90  |

374 Abbreviations: ICU, intensive care unit; SD, standard deviation; mln, million.

375

376

377 **Table 2.** Results of univariate and multivariate GLM of COVID-19 deaths peak height, with normal distribution and logit link function

| Variable                                                                    | Univariate analysis |                           |        |         | Multivariate analysis      |                           |         |          |                                                    |        |         |         |   |
|-----------------------------------------------------------------------------|---------------------|---------------------------|--------|---------|----------------------------|---------------------------|---------|----------|----------------------------------------------------|--------|---------|---------|---|
|                                                                             | Estimate            | Wald 95% confidence limit |        | p-value | Base case GLM (Full model) |                           |         |          | Base case GLM + selection algorithms (Final model) |        |         |         |   |
|                                                                             |                     | Wald 95% confidence limit |        |         | Estimate                   | Wald 95% confidence limit | p-value | Estimate | Wald 95% confidence limit                          |        | p-value |         |   |
|                                                                             |                     | Lower                     | Upper  |         |                            |                           |         |          | Lower                                              | Upper  |         |         |   |
| All beds capacity [per 1 mln inhabitants]                                   | -0.0002             | -0.001                    | 0.0001 | 0.109   | -                          | -                         | -       | -        | -                                                  | -      | -       | -       | - |
| ICU beds capacity [per 1 mln inhabitants]                                   | -0.002              | -0.008                    | 0.003  | 0.404   | -                          | -                         | -       | -        | -                                                  | -      | -       | -       | - |
| Total no. of tests up to time of the peak [per 1 mln inhabitants]           | 0.000               | -0.001                    | 0.001  | 0.961   | -                          | -                         | -       | -        | -                                                  | -      | -       | -       | - |
| Stay-at-home order day                                                      | 0.027               | -0.001                    | 0.053  | 0.057** | -                          | -                         | -       | -        | -                                                  | -      | -       | -       | - |
| Educational facilities closure day                                          | 0.067               | 0.028                     | 0.107  | 0.001*  | -                          | -                         | -       | -        | -                                                  | -      | -       | -       | - |
| Gathering restrictions day                                                  | 0.045               | 0.006                     | 0.084  | 0.023*  | -                          | -                         | -       | -        | -                                                  | -      | -       | -       | - |
| Businesses closure day                                                      | 0.029               | 0.009                     | 0.049  | 0.005*  | -0.001                     | -0.022                    | 0.020   | 0.944    | -                                                  | -      | -       | -       | - |
| Population size [mln]                                                       | 0.001               | -0.009                    | 0.011  | 0.877   | -                          | -                         | -       | -        | -                                                  | -      | -       | -       | - |
| Proportion living in urban areas                                            | 8.117               | 3.695                     | 12.539 | <0.001* | 7.127                      | 3.642                     | 10.611  | <0.001*  | 6.848                                              | 4.016  | 9.680   | <0.001* | - |
| Proportion living in metropolitan cities with more than 1 mln inhabitants   | 2.428               | -0.464                    | 5.319  | 0.099** | 1.063                      | -1.331                    | 3.457   | 0.384    | -                                                  | -      | -       | -       | - |
| Median age                                                                  | -0.0003             | -0.120                    | 0.120  | 0.996   | -                          | -                         | -       | -        | -                                                  | -      | -       | -       | - |
| Arrivals at airports in 2018 [per 1 inhabitant]                             | 0.016               | -0.097                    | 0.129  | 0.784   | -                          | -                         | -       | -        | -                                                  | -      | -       | -       | - |
| No. of foreign tourists in 2018 [per 1 inhabitant]                          | -0.076              | -0.421                    | 0.270  | 0.668   | -                          | -                         | -       | -        | -                                                  | -      | -       | -       | - |
| Mobility score at the day of first reported death                           | 0.048               | 0.001                     | 0.096  | 0.046*  | 0.041                      | -0.0004                   | 0.083   | 0.052*   | 0.049                                              | 0.022  | 0.077   | <0.001* | - |
| Borders closure day                                                         | 0.025               | 0.010                     | 0.041  | 0.002*  | -0.005                     | -0.030                    | 0.021   | 0.729    | -                                                  | -      | -       | -       | - |
| No. of COVID-19 infections when borders were closed [per 1 mln inhabitants] | 0.0002              | 0.0000                    | 0.004  | 0.022*  | 0.0003                     | -0.0001                   | 0.001   | 0.113    | 0.0002                                             | 0.0001 | 0.0003  | 0.016*  | - |
| No. of COVID-19 deaths when borders were closed [per 1 mln inhabitants]     | 0.004               | 0.001                     | 0.007  | 0.002*  | -                          | -                         | -       | -        | -                                                  | -      | -       | -       | - |
| <b>Multivariate models statistics</b>                                       |                     |                           |        |         |                            |                           |         |          |                                                    |        |         |         |   |
| Scale                                                                       | -                   | -                         | -      | -       | 5.020                      | 3.958                     | 6.367   | -        | 5.092                                              | 4.015  | 6.458   | -       | - |
| AIC                                                                         | -                   | -                         | -      | -       | 222.203                    | -                         | -       | -        | 217.169                                            | -      | -       | -       | - |
| AICC                                                                        | -                   | -                         | -      | -       | 227.963                    | -                         | -       | -        | 219.312                                            | -      | -       | -       | - |

378 \*p-value <0.05; \*\*p-value < 0.1.

379 Abbreviations: AIC, Akaike's Information Criterion; AICC, AIC corrected for small sample sizes; GLM, generalised linear models; ICU, intensive care unit; mln, million.

380 GLM univariate and multivariate models with normal distribution and logit link function were used to explore factors associated with COVID-19 deaths peak height as of 3<sup>rd</sup> June 2020. Each model  
 381 was run using 34 observations. Variables significant in univariate models were included into the multivariate base case model, avoiding highly correlated pairs. The final multivariate model was  
 382 selected based on the use of selection algorithms (backward, forward, stepwise and the genetic algorithm).  
 383  
 384  
 385

386  
387

**Table 3.** Results of univariate and multivariate GLM of time to COVID-19 deaths peak, with normal distribution and identity link function

| Variable                                                                    | Univariate analysis |                           |        |         | Multivariate analysis      |                           |        |         |                                                    |                           |        |         |
|-----------------------------------------------------------------------------|---------------------|---------------------------|--------|---------|----------------------------|---------------------------|--------|---------|----------------------------------------------------|---------------------------|--------|---------|
|                                                                             | Estimate            | Wald 95% confidence limit |        | p-value | Base case GLM (Full model) |                           |        |         | Base case GLM + selection algorithms (Final model) |                           |        |         |
|                                                                             |                     | Wald 95% confidence limit |        |         | Estimate                   | Wald 95% confidence limit |        | p-value | Estimate                                           | Wald 95% confidence limit |        | p-value |
|                                                                             |                     | Lower                     | Upper  |         |                            | Lower                     | Upper  |         |                                                    | Lower                     | Upper  |         |
| All beds capacity [per 1 mln inhabitants]                                   | 0.003               | 0.001                     | 0.006  | 0.012*  | 0.003                      | 0.001                     | 0.005  | 0.006*  | 0.003                                              | 0.001                     | 0.005  | 0.004*  |
| ICU beds capacity [per 1 mln inhabitants]                                   | 0.046               | -0.008                    | 0.101  | 0.095** | -0.007                     | -0.049                    | 0.034  | 0.731   | -                                                  | -                         | -      | -       |
| Total no. of tests up to time of the peak [per 1 mln inhabitants]           | -0.002              | -0.008                    | 0.005  | 0.598   | -                          | -                         | -      | -       | -                                                  | -                         | -      | -       |
| Stay-at-home order day                                                      | 0.201               | -0.248                    | 0.649  | 0.381   | -                          | -                         | -      | -       | -                                                  | -                         | -      | -       |
| Educational facilities closure day                                          | 0.680               | 0.164                     | 1.195  | 0.010*  | -                          | -                         | -      | -       | -                                                  | -                         | -      | -       |
| Gathering restrictions day                                                  | 0.530               | 0.019                     | 1.040  | 0.042*  | -                          | -                         | -      | -       | -                                                  | -                         | -      | -       |
| Businesses closure day                                                      | 0.365               | -0.081                    | 0.810  | 0.108   | -                          | -                         | -      | -       | -                                                  | -                         | -      | -       |
| Population size [mln]                                                       | 0.250               | 0.135                     | 0.364  | <0.001* | 0.117                      | 0.002                     | 0.231  | 0.047*  | 0.142                                              | 0.037                     | 0.246  | 0.008*  |
| Proportion living in urban areas                                            | 0.508               | -37.667                   | 38.683 | 0.979   | -                          | -                         | -      | -       | -                                                  | -                         | -      | -       |
| Proportion living in metropolitan cities with more than 1 mln inhabitants   | 13.812              | -10.931                   | 38.554 | 0.274   | -                          | -                         | -      | -       | -                                                  | -                         | -      | -       |
| Median age                                                                  | -0.278              | -1.860                    | 1.304  | 0.730   | -                          | -                         | -      | -       | -                                                  | -                         | -      | -       |
| Arrivals at airports in 2018 [per 1 inhabitant]                             | -1.908              | -3.573                    | -0.243 | 0.025*  | -                          | -                         | -      | -       | -                                                  | -                         | -      | -       |
| No. of foreign tourists in 2018 [per 1 inhabitant]                          | -5.099              | -8.203                    | -1.995 | 0.001*  | -2.872                     | -5.341                    | -0.403 | 0.023*  | -2.651                                             | -5.137                    | -0.165 | 0.037*  |
| Mobility score at the day of first reported death                           | 0.337               | 0.117                     | 0.557  | 0.003*  | 0.132                      | -0.092                    | 0.356  | 0.249   | -                                                  | -                         | -      | -       |
| Borders closure day                                                         | 0.326               | 0.045                     | 0.607  | 0.023*  | 0.215                      | -0.047                    | 0.477  | 0.108   | 0.297                                              | 0.079                     | 0.514  | 0.008*  |
| No. of COVID-19 infections when borders were closed [per 1 mln inhabitants] | 0.001               | -0.004                    | 0.005  | 0.739   | -                          | -                         | -      | -       | -                                                  | -                         | -      | -       |
| No. of COVID-19 deaths when borders were closed [per 1 mln inhabitants]     | 0.038               | -0.026                    | 0.102  | 0.244   | -                          | -                         | -      | -       | -                                                  | -                         | -      | -       |
| <b>Multivariate models statistics</b>                                       |                     |                           |        |         |                            |                           |        |         |                                                    |                           |        |         |
| Scale                                                                       | -                   | -                         | -      | -       | 8.713                      | 6.870                     | 11.050 | -       | 8.901                                              | 7.018                     | 11.289 | -       |
| AIC                                                                         | -                   | -                         | -      | -       | 259.693                    | -                         | -      | -       | 257.146                                            | -                         | -      | -       |
| AICC                                                                        | -                   | -                         | -      | -       | 265.453                    | -                         | -      | -       | 260.257                                            | -                         | -      | -       |

\*p-value < 0.05; \*\*p-value < 0.1.

Abbreviations: AIC, Akaike's Information Criterion; AICC, AIC corrected for small sample sizes; GLM, generalised linear models; ICU, intensive care unit; mln, million.

GLM univariate and multivariate models with normal distribution and identity link function were used to explore factors associated with time to COVID-19 deaths peak (starting from the day when the first death was reported in a given country), as of 3<sup>rd</sup> June 2020. Each model was run using 34 observations. Variables significant in univariate models were included into the multivariate base case model, avoiding highly correlated pairs. The final multivariate model was selected based on the use of selection algorithms (backward, forward, stepwise and the genetic algorithm).

388  
389  
390  
391  
392  
393

394 **Figure 1.** Histogram of the height of COVID-19 daily deaths peak per 1 million inhabitants  
395 with a fitted log-normal curve

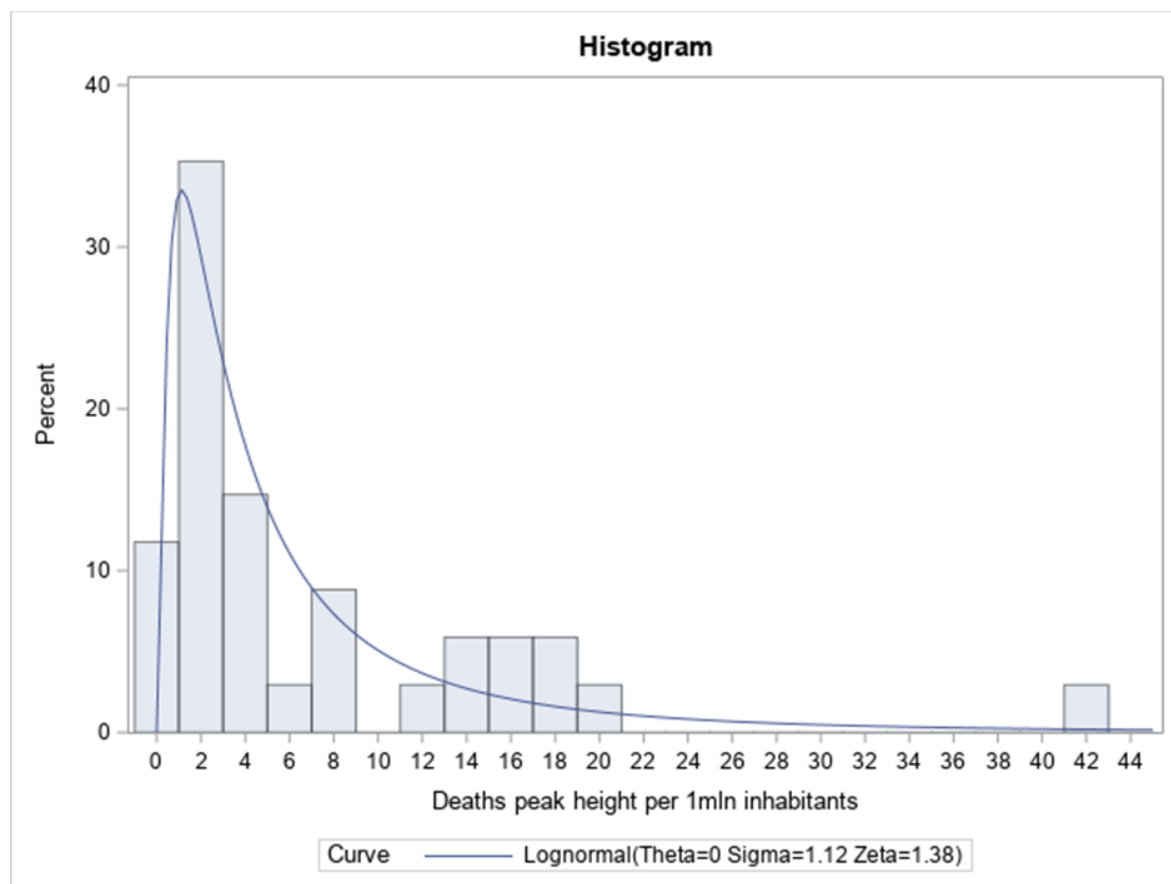

396  
397 Histogram presents the distribution of height of COVID-19 deaths peak per 1 million inhabitants across 34 countries. A log-  
398 normal curve was fitted to the distribution with scale parameter  $\sigma=1.12$  and location parameter  $\zeta=1.38$ , assuming  
399 logarithm of height of the deaths peak is normally distributed [Normal( $\zeta$ ,  $\sigma$ )].  
400

401

402 **Figure 2.** Height of COVID-19 daily deaths peak per 1 million inhabitants across countries

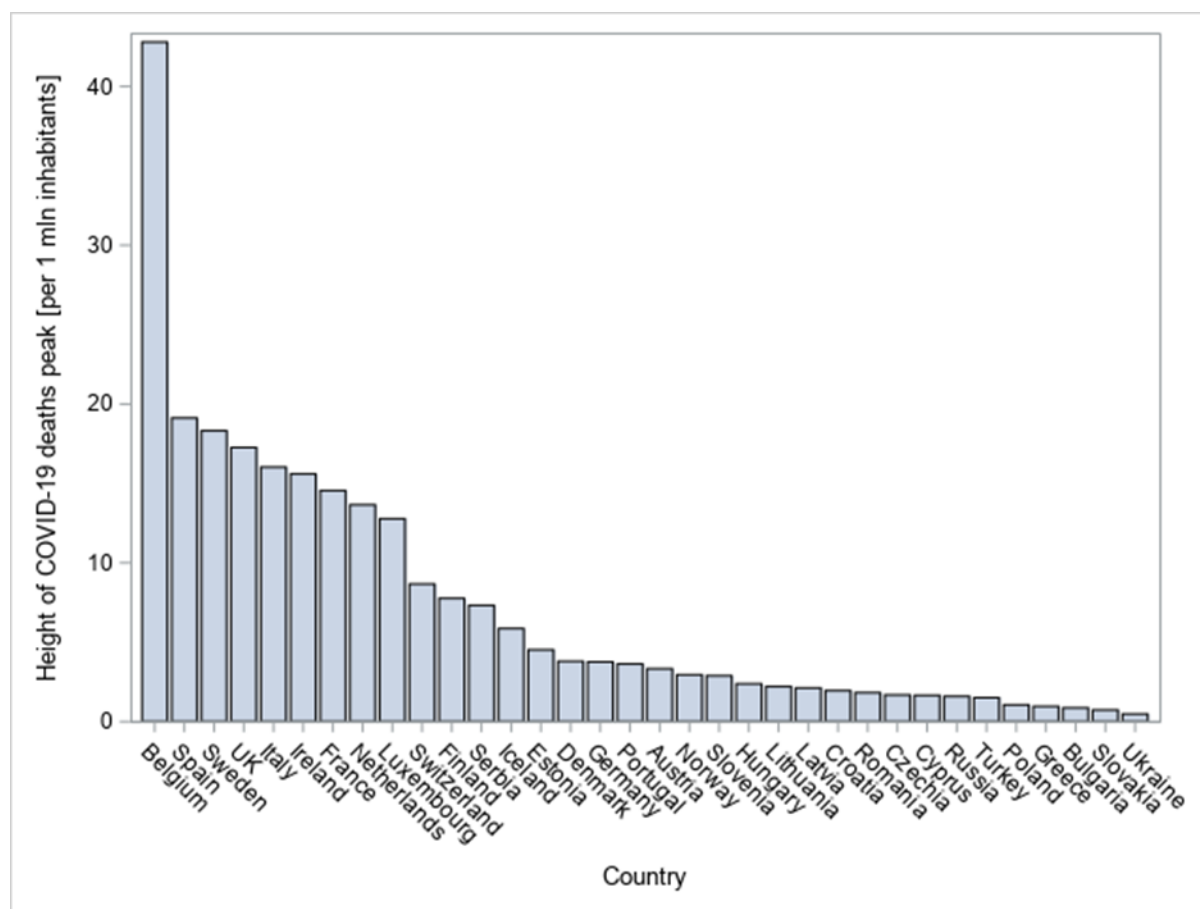

403  
404 The plot presents the height of COVID-19 deaths peak per 1 million inhabitants across 34 countries, with Belgium having  
405 outstandingly highest peak per population size (>40 deaths per 1 million inhabitants).

406

407
